# Supplementary material
Source: MDPI journal article supplement (https://www.mdpi.com/2073-4344/10/4/461)
Supplement: s1 [file s1]

## **Supplementary material**

### **Synergy effects of cobalt oxides on Ni/Co-embedded Al<sub>2</sub>O<sub>3</sub> for hydrogen-rich syngas production by steam reforming of propane**

**Kyung Soo Park, Min Hye Jeong, Jong Wook Bae\***

Supplementary **Table S1** represents the catalytic activities of the CA supports with some reference materials.

Supplementary **Figure S1** represents the textural properties of the fresh NCA catalysts measured by N<sub>2</sub> adsorption-desorption analysis of the (A) adsorption-desorption isotherms and (B) pore size distributions .

Supplementary **Figure S2** represents the wide-angle X-ray diffraction (XRD) patterns of the (A) reduced and (B) used NCA catalysts.

**Table S1.** Catalytic activities of the CA supports with some reference materials<sup>a</sup>

| Notation                          | Conversion of propane (mol %) <sup>a</sup> |        |        |
|-----------------------------------|--------------------------------------------|--------|--------|
|                                   | 550 °C                                     | 650 °C | 750 °C |
| CA(0.5)                           | 57.4                                       | 79.6   | 93.3   |
| CA(1)                             | 57.2                                       | 86.9   | 98.4   |
| CA(2)                             | 45.8                                       | 77.7   | 96.1   |
| CA(3)                             | -                                          | 2.6    | 51.8   |
| CA(4)                             | -                                          | -      | 34.2   |
| CoAl <sub>2</sub> O <sub>4</sub>  | -                                          | 4.6    | 28.4   |
| NCA(1)                            | 100                                        | 100    | 100    |
| Ni/Al <sub>2</sub> O <sub>3</sub> | 42.8                                       | 65.2   | 93.4   |

<sup>a</sup>Preliminary measurements of the catalytic activity on the CA supports with some reference catalysts such as CoAl<sub>2</sub>O<sub>4</sub> solid-solution and impregnated Ni/Al<sub>2</sub>O<sub>3</sub> for steam reforming of C<sub>3</sub>H<sub>8</sub> (SRP) with time on stream (h) were performed at the reaction conditions of T = 550 – 650 – 750 °C, P = 0.1 MPa and SV = 100,800 L/(kg<sub>cat</sub>·h) by using a feed gas composition of C<sub>3</sub>H<sub>8</sub>/N<sub>2</sub>/H<sub>2</sub>O = 1:4:9.

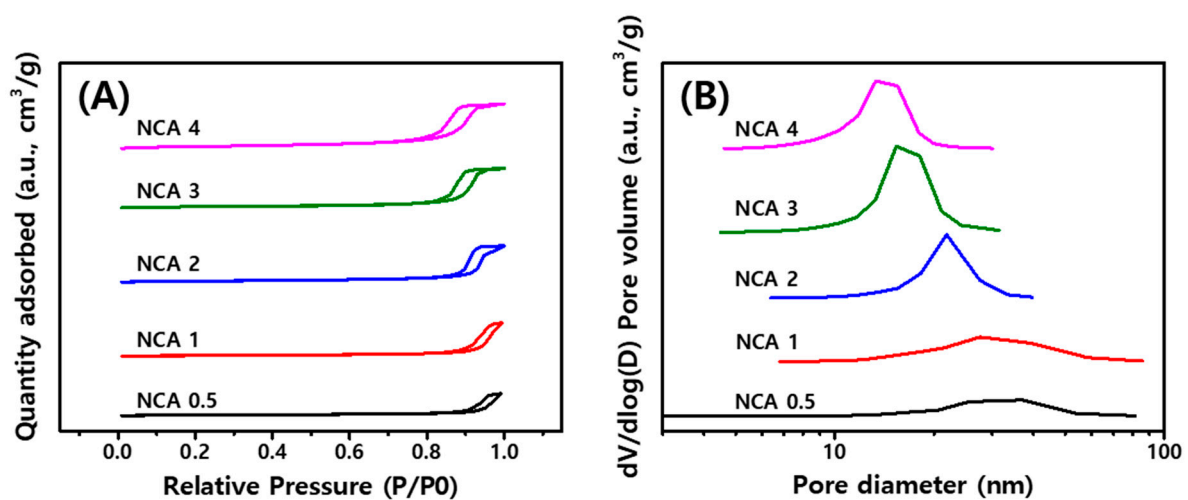

**Figure S1.** Textural properties of the fresh NCA catalysts measured by N<sub>2</sub> adsorption-desorption analysis of the (A) adsorption-desorption isotherms and (B) pore size distributions

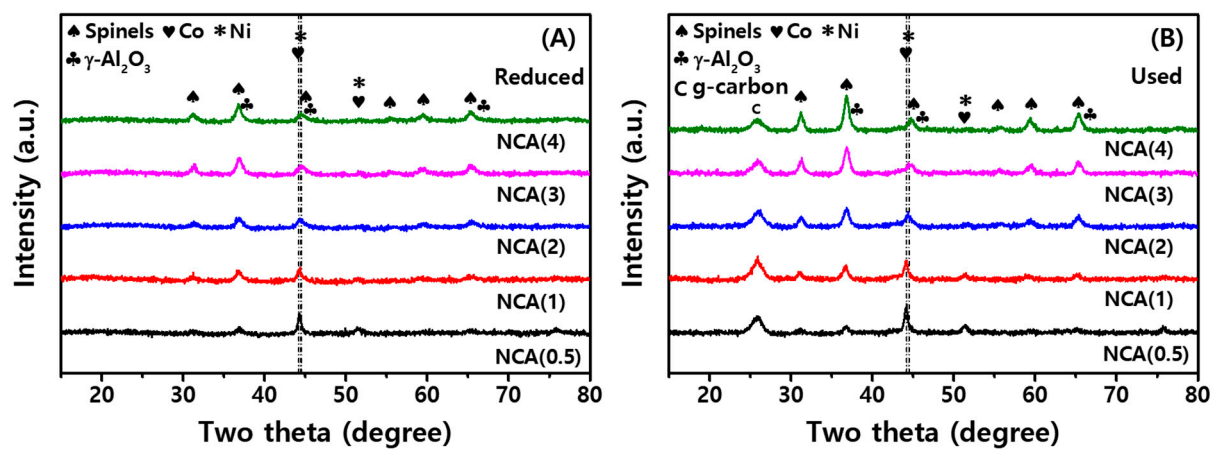

**Figure S2.** Wide-angle X-ray diffraction (XRD) patterns of the (A) reduced and (B) used NCA catalysts
